# Supplementary material for: Effectiveness of a Malaria Surveillance Strategy Based on Active Case Detection during High Transmission Season in the Peruvian Amazon
Source: PubMed Central journal article supplement (PMC6314008; doi:10.3390/ijerph15122670), 2018-11-27
Supplement: ijerph-15-02670-s001.pdf [file ijerph-15-02670-s001.pdf]

# Effectiveness of A Malaria Surveillance Strategy Based on Active Case Detection during High Transmission Season in the Peruvian Amazon

Diamantina Moreno-Gutierrez <sup>1,2,3,\*</sup>, Alejandro Llanos-Cuentas <sup>4,5</sup>, José Luis Barboza <sup>4</sup>, Juan Contreras-Mancilla <sup>4,6</sup>, Dionicia Gamboa <sup>4,6,7</sup>, Hugo Rodriguez <sup>1</sup>, Gabriel Carrasco-Escobar <sup>6,8</sup>, Raphaël Boreux <sup>9</sup>, Marie-Pierre Hayette <sup>9</sup>, Philippe Beutels <sup>3</sup>, Niko Speybroeck <sup>2,†</sup> and Angel Rosas-Aguirre <sup>2,4,†</sup>

<sup>1</sup> Facultad de Medicina Humana, Universidad Nacional de la Amazonía Peruana, Loreto 160, Peru; hmrodriguezf@hotmail.com (H.R.)

<sup>2</sup> Research Institute of Health and Society (IRSS), Université catholique de Louvain, 1200 Brussels, Belgium; niko.speybroeck@uclouvain.be (N.S.); angelrosasa@gmail.com (A.R.-A.)

<sup>3</sup> Centre for Health Economics Research and Modelling Infectious Diseases, Vaccine and Infectious Disease Institute, University of Antwerp, 2000 Antwerp, Belgium; philippe.beutels@uantwerpen.be

<sup>4</sup> Instituto de Medicina Tropical "Alexander von Humboldt", Universidad Peruana Cayetano Heredia, Lima 31, Peru; alejandro.llanos.c@upch.pe (A.L.-C.); biobarbox@gmail.com (J.L.B.); juan.contreras.m@upch.pe (J.C.-M.); dionigamboa@yahoo.com (D.G.)

<sup>5</sup> Facultad de Salud Pública y Administración, Universidad Peruana Cayetano Heredia, Lima 31, Peru.

<sup>6</sup> Laboratorios de Investigación y Desarrollo, Facultad de Ciencias y Filosofía, Universidad Peruana Cayetano Heredia, Lima 31, Peru; gabriel.carrasco@upch.pe (G.C.-E)

<sup>7</sup> Departamento de Ciencias Celulares y Moleculares, Facultad de Ciencias y Filosofía, Universidad Peruana Cayetano Heredia, Lima 31, Peru

<sup>8</sup> Division of Infectious Diseases, Department of Medicine, University of California San Diego, La Jolla, CA 92093, USA

<sup>9</sup> Department of Clinical Microbiology, Center for Interdisciplinary Research on Medicines (CIRM), University Hospital of Liège, 4000 Liège, Belgium; raphael.boreux@chuliege.be (R.B.); mphayette@chuliege.be (M.-P.H.)

\* Correspondence: dlmorenog@gmail.com

† These authors contributed equally to this work.

SUPPLEMENTARY MATERIAL

Table S1. Evolution of clinical status of malaria infections detected and undetected by ACD-based strategy using light microscopy (LM)

| Time of detection of malaria infections by qPCR | qPCR-positive malaria infections detected by ACD-based strategy using light microscopy (LM) |                                 |                             |                             |              |       | qPCR-positive malaria infections undetected by ACD-based strategy using light microscopy (LM) |                                 |                             |                             |              |       |
|-------------------------------------------------|---------------------------------------------------------------------------------------------|---------------------------------|-----------------------------|-----------------------------|--------------|-------|-----------------------------------------------------------------------------------------------|---------------------------------|-----------------------------|-----------------------------|--------------|-------|
|                                                 | Symptomatic                                                                                 |                                 |                             |                             | Asymptomatic | Total | Symptomatic                                                                                   |                                 |                             |                             | Asymptomatic | Total |
|                                                 | In the same visit                                                                           | In following visit (10-d later) | After 2 visits (20-d later) | After 3 visits (30-d later) |              |       | In the same visit                                                                             | In following visit (10-d later) | After 2 visits (20-d later) | After 3 visits (30-d later) |              |       |
|                                                 | n (%)                                                                                       | n (%)                           | n (%)                       | n (%)                       | n (%)        | N     | n (%)                                                                                         | n (%)                           | n (%)                       | n (%)                       | n (%)        | N     |
| <b>Overall</b>                                  |                                                                                             |                                 |                             |                             |              |       |                                                                                               |                                 |                             |                             |              |       |
| 1st visit                                       | 20 (47.6)                                                                                   | 5 (11.9)                        | 2 (4.8)                     | 0 (0)                       | 15 (35.7)    | 42    | 56 (40.9)                                                                                     | 13 (9.5)                        | 8 (5.8)                     | 2 (1.5)                     | 58 (42.3)    | 137   |
| 2nd visit                                       | 5 (25.0)                                                                                    | 4 (20.0)                        | 2 (10.0)                    | ND                          | 9 (45.0)     | 20    | 15 (18.5)                                                                                     | 8 (9.9)                         | 10 (12.3)                   | ND                          | 48 (59.3)    | 81    |
| 3rd visit                                       | 14 (53.8)                                                                                   | 3 (11.5)                        | ND                          | ND                          | 9 (34.6)     | 26    | 8 (11.9)                                                                                      | 8 (11.9)                        | ND                          | ND                          | 51 (76.1)    | 67    |
| 4th visit                                       | 2 (15.4)                                                                                    | ND                              | ND                          | ND                          | 11 (84.6)    | 13    | 8 (12.9)                                                                                      | ND                              | ND                          | ND                          | 54 (87.1)    | 62    |
| Total                                           | 41 (40.6)                                                                                   | 12 (11.9)                       | 4 (4.0)                     | 0 (0)                       | 44 (43.6)    | 101   | 87 (25.1)                                                                                     | 29 (8.4)                        | 18 (5.2)                    | 2 (0.6)                     | 211 (60.8)   | 347   |
| <b><i>P. vivax</i></b>                          |                                                                                             |                                 |                             |                             |              |       |                                                                                               |                                 |                             |                             |              |       |
| 1st visit                                       | 17 (44.7)                                                                                   | 4 (10.5)                        | 2 (5.3)                     | 0 (0)                       | 15 (39.5)    | 38    | 43 (43.9)                                                                                     | 9 (9.2)                         | 6 (6.1)                     | 1 (1.0)                     | 39 (39.8)    | 98    |
| 2nd visit                                       | 5 (15.6)                                                                                    | 4 (12.5)                        | 2 (6.3)                     | ND                          | 21 (65.6)    | 32    | 13 (28.3)                                                                                     | 6 (13.0)                        | 6 (13.0)                    | ND                          | 21 (45.7)    | 46    |
| 3rd visit                                       | 14 (42.4)                                                                                   | 3 (9.1)                         | ND                          | ND                          | 16 (48.5)    | 33    | 8 (16.0)                                                                                      | 7 (14.0)                        | ND                          | ND                          | 35 (70.0)    | 50    |
| 4th visit                                       | 2 (15.4)                                                                                    | ND                              | ND                          | ND                          | 11 (84.6)    | 13    | 6 (12.5)                                                                                      | ND                              | ND                          | ND                          | 42 (87.5)    | 48    |
| Total                                           | 38 (39.2)                                                                                   | 11 (11.3)                       | 4 (4.1)                     | 0 (0)                       | 44 (45.4)    | 97    | 70 (26.8)                                                                                     | 22 (8.4)                        | 12 (4.6)                    | 1 (0.4)                     | 156 (59.8)   | 261   |
| <b><i>P. falciparum</i></b>                     |                                                                                             |                                 |                             |                             |              |       |                                                                                               |                                 |                             |                             |              |       |
| 1st visit                                       | 3 (100)                                                                                     | 0 (0)                           | 0 (0)                       | 0 (0)                       | 0 (0)        | 3     | 9 (34.6)                                                                                      | 1 (3.8)                         | 0 (0)                       | 1 (3.8)                     | 15 (57.7)    | 26    |
| 2nd visit                                       | 0 (0)                                                                                       | 0 (0)                           | 0 (0)                       | ND                          | 0 (0)        | 0     | 2 (11.8)                                                                                      | 0 (0)                           | 4 (23.5)                    | ND                          | 11 (64.7)    | 17    |
| 3rd visit                                       | 0 (0)                                                                                       | 0 (0)                           | ND                          | ND                          | 0 (0)        | 0     | 0 (0)                                                                                         | 1 (12.5)                        | ND                          | ND                          | 7 (87.5)     | 8     |
| 4th visit                                       | 0 (0)                                                                                       | ND                              | ND                          | ND                          | 0 (0)        | 0     | 2 (14.3)                                                                                      | ND                              | ND                          | ND                          | 12 (85.7)    | 14    |
| Total                                           | 3 (100)                                                                                     | 0 (0)                           | 0 (0)                       | 0 (0)                       | 0 (0)        | 3     | 13 (20.0)                                                                                     | 2 (3.1)                         | 4 (6.2)                     | 1 (1.5)                     | 45 (69.2)    | 65    |
| <b>Co-infection*</b>                            |                                                                                             |                                 |                             |                             |              |       |                                                                                               |                                 |                             |                             |              |       |
| 1st visit                                       | 0 (0)                                                                                       | 1 (100)                         | 0 (0)                       | 0 (0)                       | 0 (0)        | 1     | 4 (30.8)                                                                                      | 3 (23.1)                        | 2 (15.4)                    | 0 (0)                       | 4 (30.8)     | 13    |
| 2nd visit                                       | 0 (0)                                                                                       | 0 (0)                           | 0 (0)                       | ND                          | 0 (0)        | 0     | 0 (0)                                                                                         | 2 (33.3)                        | 0 (0)                       | ND                          | 4 (66.7)     | 6     |
| 3rd visit                                       | 0 (0)                                                                                       | 0 (0)                           | ND                          | ND                          | 0 (0)        | 0     | 0 (0)                                                                                         | 0 (0)                           | ND                          | ND                          | 2 (100)      | 2     |
| 4th visit                                       | 0 (0)                                                                                       | ND                              | ND                          | ND                          | 0 (0)        | 0     | 0 (0)                                                                                         | ND                              | ND                          | ND                          | 0 (0)        | 0     |
| Total                                           | 0 (0)                                                                                       | 1 (100)                         | 0 (0)                       | 0 (0)                       | 0 (0)        | 1     | 4 (19.0)                                                                                      | 5 (23.8)                        | 2 (9.5)                     | 0 (0)                       | 10 (47.6)    | 21    |

\**P. vivax*-*P. falciparum*. ND: no data
